# Supplementary material for: Atmospheric pressure spatial atomic layer deposition of p-type CuO thin films from copper(ii) acetylacetonate and ozone for UV detection
Source: Royal Society of Chemistry journal article supplement (doi:10.1039/d4dt02689f), 2025-01-01
Supplement: d4dt02689f1.pdf [file d4dt02689f1.pdf]

## Supporting Information

### Atmospheric Pressure Spatial Atomic Layer Deposition of p-type CuO thin films from copper (II) acetylacetonate and ozone for UV detection

Hung-Anh Tran Vu<sup>1,2</sup>, Duc-Trung Pham<sup>2</sup>, Hang Tran Thi My<sup>2</sup>, Duc Anh Duong<sup>2</sup>, Abdullah H. Alshehri<sup>3</sup>, Van Tan Tran<sup>4</sup>, Thi Minh Hien Nguyen<sup>5</sup>, De Pham-Cong<sup>6</sup>, Viet Huong Nguyen<sup>2,\*</sup>

<sup>1</sup>Phenikaa University Nano Institute (PHENA), Phenikaa University, Hanoi 12116, Viet Nam

<sup>2</sup>Faculty of Materials Science and Engineering, Phenikaa University, Hanoi 12116, Viet Nam

<sup>3</sup>Department of Mechanical Engineering College of Engineering in Al-Kharj Prince Sattam Bin Abdulaziz University Al Kharj 11942, Saudi Arabia

<sup>4</sup>Faculty of Biotechnology, Chemistry and Environmental Engineering, Phenikaa University, Hanoi 12116, Viet Nam

<sup>5</sup>Institute of Physics, Vietnam Academy of Science and Technology, 18 Hoang Quoc Viet, Hanoi, Viet Nam

<sup>6</sup>Department of Nanoenergy Engineering and College of Nanoscience and Nanotechnology, Pusan National University, Busan 46241, Republic of Korea.

\*Email: [huong.nguyenviet@phenikaa-uni.edu.vn](mailto:huong.nguyenviet@phenikaa-uni.edu.vn)

Figure S1 illustrates the XRD diffractogram of CuO sample prepared with 4000 ALD cycles at 275 °C. The results should a tenorite CuO phase with unobservable Cu<sub>2</sub>O contribution.

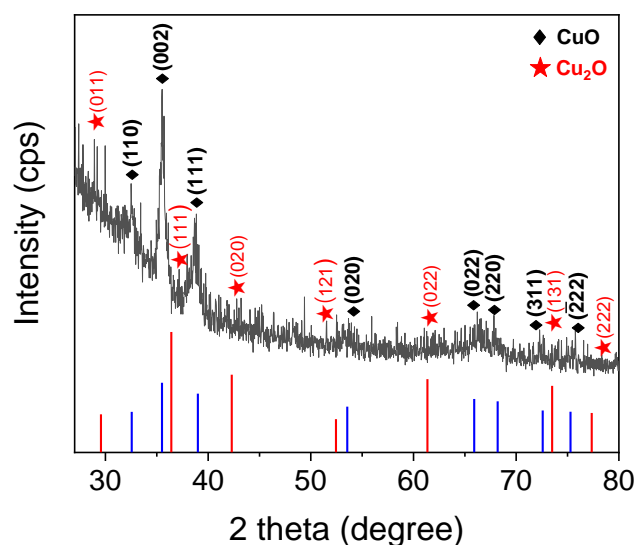

Figure S1: XRD pattern of CuO thin film fabricated with 4000 ALD cycles at 275 °C.

To illustrate the critical role of p-type CuO in the photodiode, we have performed the measurement of photocurrent in the two conditions: forward bias (1 V) and reverse bias (-1 V). With solely the photoactivity of ZnO, the photocurrent cannot significantly enhance (Fig

S2a), while with the built-in electric field created from p-CuO/n-ZnO heterojunction, we can observed the higher performance.

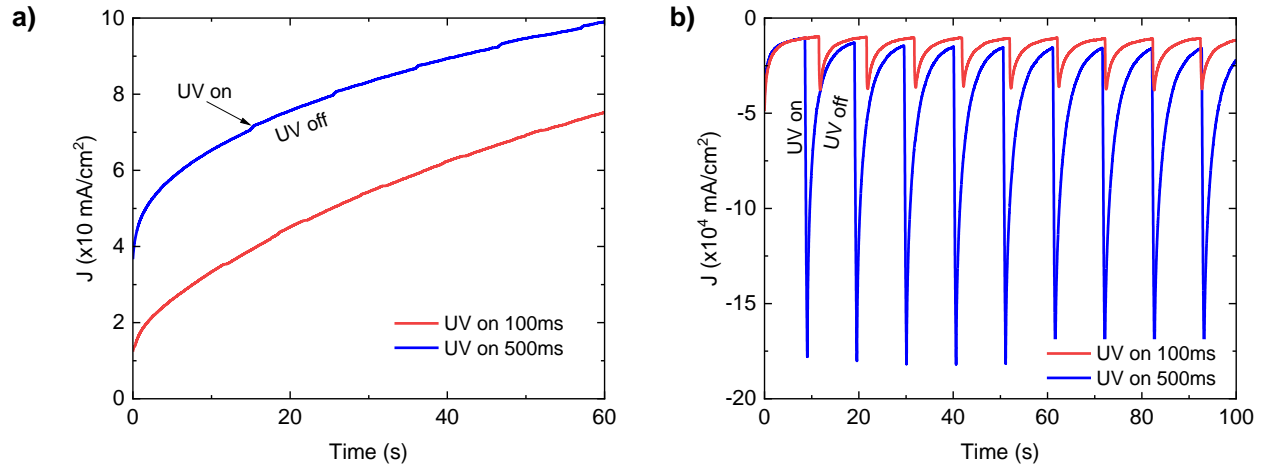

Figure S2: Photo-response versus time of p-CuO/n-ZnO photodiode under 365nm light illumination at a) forward bias 1 V and b) reverse bias -1 V, at room temperature conditions.

We conducted additional photocurrent measurements using 395 nm light, which lies beyond the primary absorption range of ZnO. As shown in Figure S3, the device demonstrates a weak but observable photo-response at 395 nm, while the performance at 365 nm can be clearly seen. This results indicate that the main role of p-type CuO in this UV diode is not the absorber but indeed to create an efficient junction with n-type ZnO to enhance the photocurrent in such a UV detector.

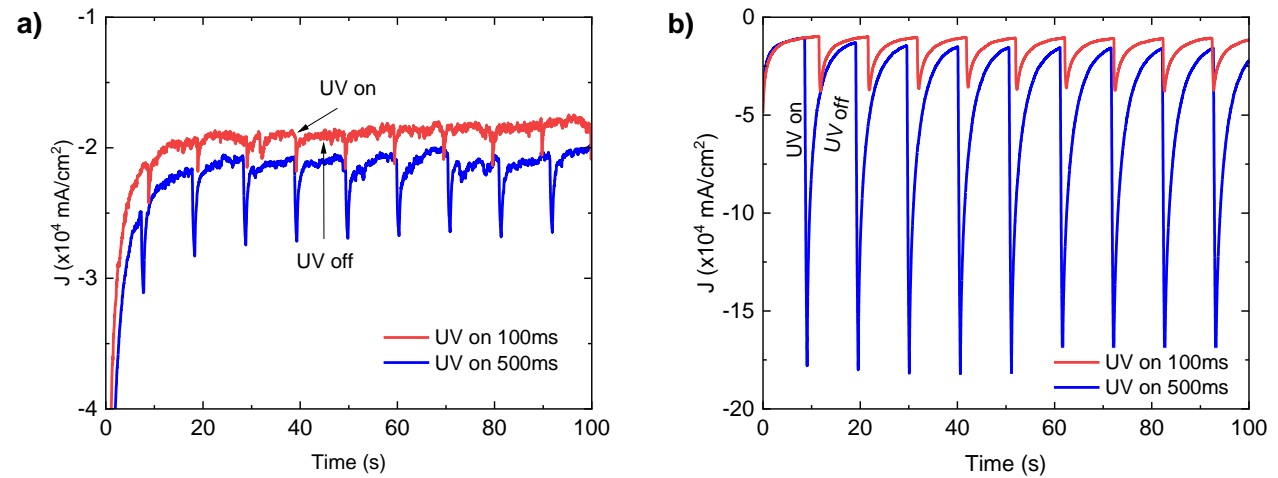

Figure S3: Photo-response versus time of p-CuO/n-ZnO photodiode under a) 395 nm and b) 365nm light illumination at -1 V reverse bias voltage, and at room temperature conditions.
